# Evaluation of Fecal Occult Blood Testing Kits for Rapid Point-of-Care Diagnosis of Invasive Diarrhea in Young Children

David A. Kwasi<sup>1,2</sup>, Pelumi D. Adewole<sup>1</sup>, Olabisi C. Akinlabi<sup>1</sup>, Stella E. Ekpo<sup>1</sup> and Iruka N. Okeke<sup>1</sup>

1. Department of Pharmaceutical Microbiology, Faculty of Pharmacy, University of Ibadan, Oyo State, Nigeria.

2. Department of Pharmaceutical Chemistry, Faculty of Pharmacy, University of Ibadan, Ibadan, Oyo State, Nigeria.

\* [iruka.n.okeke@gmail.com](mailto:iruka.n.okeke@gmail.com)

26  
27  
28  
29  
30  
31  
32  
33  
34  
35  
36  
37  
38  
39  
40  
41  
42  
43  
44  
45  
46  
47  
48  
49  
50

## Abstract

### Background

Antimicrobials are only indicated in acute childhood diarrhea when the infection is invasive (and therefore often bloody), or persistent. Rapid and cost-effective screening for invasive diarrhea at the point of care can therefore inform treatment decisions. Multiple rapid fecal occult blood testing (FOBT) kit brands are widely available in Nigeria. This study aimed to compare the diagnostic utility of locally procurable FOBT kits in invasive infantile diarrhea to the innovators product, using fecal microscopy as the gold standard.

### Materials and Methods

Fecal specimens from 46 children under 5 years old with diarrhea, being collected as part of ongoing case-control studies, were tested according to manufacturers' instructions for each of five FOBT kits. Fecal microscopy for occult blood, and culture for bacterial pathogens were also performed concomitantly using standard procedures.

### Results

Stool microscopy confirmed almost ubiquitous presence of white blood cells in stool from children with diarrhea, whereas red blood cells were less commonly detected. A positive FOBT reaction was only seen when red blood cells were present at more than trace levels and was partially correlated with the presence of a potentially invasive pathogen. Each of the five FOBT kits tested showed 54-61% sensitivity, 87-90% specificity, and acceptable positive- and negative- predictive values for invasive diarrhea.

### Conclusions

Four inexpensive, locally available kits identified invasive pediatric diarrheas showed reasonable performance for detecting likely invasive diarrhea and performed similarly to the more difficult-to-procure innovator's product. FOBT kits are a rapid option for presumptive diagnosis of invasive diarrhea, are a viable alternative to stool microscopy for paediatric specimens at the point-of-care, and could serve as early warning indicators for dysentery outbreaks.

51 **Keywords:** fecal occult blood, invasive diarrhea, paediatric, microscopy.

## 52 **Introduction**

53 Infectious acute diarrhea can be life -hreatening in children [1,2] and hence requires prompt diagnosis and  
54 management. Most diarrhea infections are self-resolving with rehydration being the principal intervention  
55 required [3]. The decision to use antimicrobials when indicated is best informed by stool microscopy,  
56 culture, and susceptibility tests. These tests require trained laboratory personnel and, in the case of culture,  
57 take a few days to complete [4]. Inevitably, initial therapeutic choices are not always the most appropriate,  
58 which can cause delays in instituting the right treatment or promote antimicrobial use when not indicated.  
59 A rapid and cost-effective screening process to identify likely invasive infections at the point-of-care is thus  
60 expedient. This is particularly true in Nigeria where diarrhea is an important cause of childhood illness and  
61 death and where antimicrobial overuse places the entire population at high risk of the consequences of  
62 antimicrobial resistance [5,6,7]. A range of conditions, including gastrointestinal cancers, malabsorption,  
63 abdominal pain, constipation and iron deficiency anemia can result in gross or occult blood in stool but the  
64 list of conditions includes shigellosis and other enteric invasive infections [8,9,10,11].  
65 Blood in stool is ideally detected by microscopy but tests designed to detect haemoglobin are commonly  
66 used as a diagnostic aid for carcinomas and invasive diarrhea [12]. These spot tests do not require trained  
67 microscopists and are easy to perform. We observed that several brands of kits for these tests are available  
68 on the Nigerian market. Previously, Bardhan et. al. [13] investigated the role of clinical features, fecal  
69 microscopy (FM), and fecal occult blood testing (FOBT) in distinguishing invasive diarrheas from non-  
70 invasive ones in Dhaka, Bangladesh. In that setting, the presence of visible blood in faeces was a reliable  
71 indicator of invasive diarrhea. When gross blood could not be seen, occult blood was equivalently reliable,  
72 unless a test kit with poor sensitivity was employed. Bardhan *et al.* [13] thus found that FOBT was a  
73 valuable test in delineating non-bloody diarrhea in Dhaka, and this was comparable to fecal microscopy  
74 outcomes. The aim of this study was to compare the diagnostic efficacy of locally procurable rapid fecal  
75 occult blood test (FOBT) kits at identifying invasive infantile diarrhea in northern Ibadan, Nigeria with  
76 fecal microscopy as the gold standard.

77

## 78 **Materials and Methods**

### 79 **Ethical considerations**

80 Ethical approval for this work was obtained from the UI/UCH ethics committee (approval number  
81 UI/EC/15/093). Study participants' guardians provided written informed consent for their participation in  
82 the study.

### 83 **Fecal occult blood test**

84 A total of four FOBT kits were evaluated in this study alongside the innovator's product (Cromatest, Spain)  
85 (Table 1). Forty-six (46) Fecal specimens from children below 5 years old with diarrhea, being collected as  
86 part of a case-control study in our laboratory in Nigeria, were tested according to manufacturers'  
87 instructions for each kit. A sample was either considered negative for FOBT if a single line is spotted on  
88 the test strip or positive if two lines (one being the control line) was found on the test strip at the end of the  
89 testing procedure. Diagnostic test efficacy was computed as described earlier [14].

### 90 **Stool microscopy testing**

91 Fecal microscopy for occult blood (the control assay for the FOBT tests), was done using wet mount method  
92 [15] and culture for bacterial pathogens was also performed concomitantly using standard procedures.

### 93 **Bacteria culture and biochemical testing**

94 Bacterial culture of stool specimens was performed using standard methods as described by Murray *et al.*,  
95 1995 while biochemical identification of strains was carried out using Microbat 12B, 12E and 24E kits.  
96 Molecular identification of pathogen subtypes were performed by polymerase chain reaction (PCR), as  
97 described previously [16,17]. Briefly, isolate DNA was extracted aseptically using the Wizard Genomic  
98 Extraction kit (Promega). Polymerase chain reaction(PCR) for enteropathogenic, enterotoxigenic,  
99 enteroinvasive, enteroaggregative and Shiga-toxin-producing *E. coli*, and for *Salmonella enterica* using the  
100 methods described earlier [18,19] Identified pathotypes were confirmed by Whole genome sequencing  
101 using Illumina platform. Raw reads quality check, assembly, assembly quality check and speciation was

102 done according to Akinlabi *et al.*, 2022. Sequence data were submitted to ENA and are available from  
103 ENA <https://www.ebi.ac.uk/ena/browser/home> and Genbank <https://www.ncbi.nlm.nih.gov/genbank/> as  
104 Bioproject PRJEB8667.

### 105 **Data analysis**

106 Data from FOBT assays for each kit were analyzed by comparing outcomes to microscopic data and  
107 subsequently estimating sensitivity, selectivity, positive and negative predictive values using standard  
108 formulae. Statistical testing was also performed by the Fisher's Exact Test in EpiInfo Software.  
109 FOBT kit specificity, sensitivity, positive predictive values, and negative predictive values were computed  
110 using the following formulae:

$$111 \text{ Specificity} = \frac{\text{True negatives}}{\text{True negative} + \text{False positive}} \times 100$$

$$112 \text{ Sensitivity} = \frac{\text{True positive}}{\text{True positive} + \text{False negative}} \times 100$$

$$113 \text{ Positive predictive value} = \frac{\text{True positive}}{\text{True positive} + \text{False positive}} \times 100$$

$$114 \text{ Negative predictive value} = \frac{\text{True negative}}{\text{True negative} + \text{False negative}} \times 100$$

115

116

117

118

119

120

121

122 **Table 1: Preliminary information on the five FOBT kits investigated**

| <b>Brand of kit</b> | <b>Country of manufacture</b> | <b>Kit components (Extraction buffer, test strip, reaction cups)</b> | <b>Non-kit components required</b> | <b>Price per unit in 2017 (₺)</b> | <b>Storage recommendation</b> |
|---------------------|-------------------------------|----------------------------------------------------------------------|------------------------------------|-----------------------------------|-------------------------------|
| Cromatest*          | Spain                         | 2                                                                    | 2                                  | 600                               | 2-30°C                        |
| Abon                | China                         | 3                                                                    | 2                                  | 360                               | 2-30°C                        |
| Diaspot             | Indonesia                     | 3                                                                    | 2                                  | 360                               | 2-30°C                        |
| LabACON             | China and Canada              | 3                                                                    | 2                                  | 280                               | 2-30°C                        |
| MICROPOINT          | USA                           | 2                                                                    | 3                                  | 280                               | 2-30°C                        |

123 \*Innovator's product

124

125

126

127 **Results**

128 **Diagnostic efficacy of FOBT kits evaluated**

129 The five kits tested used an easy-to-follow protocol executable in 4-7 minutes using 2-3 kit components  
130 and user-supplied sterile swab sticks (Table 1). All tests gave control line results so that none of the test  
131 strips used had to be invalidated. As shown in Figure 1, a positive result was easy to call for each kit. Twelve  
132 (12) of 46 (26.1%) specimens examined gave positive FOBT outcomes with the innovator's kit (Cromatest),  
133 eight of which were also positive by stool microscopy (Table 2). All kits evaluated had comparable  
134 specificity with the innovator product (Cromatest), with Diaspot exhibiting slightly higher specificity than  
135 the other kits tested, including Cromatest (Table 3). The negative and positive predictive values for the kits  
136 were also comparable (Table 3). LabACON and Abon were however insufficiently sensitive compared to  
137 the innovator and the other generics kits tested (Table 3).

138

139

140

141



142 **Table 2: Microscopy, FOBT outcomes and aetiologic agents**

| Sample code                                                                  | MICROSCOPY (number of cells per field) |       |              | CROMAT<br>FOBT | Abon | Diaspot | LabACON | MICROPO<br>FOBT | Invasive pathogens identified            | Non invasive pathogens identified |
|------------------------------------------------------------------------------|----------------------------------------|-------|--------------|----------------|------|---------|---------|-----------------|------------------------------------------|-----------------------------------|
|                                                                              | RBC                                    | WBC   | Occult blood |                |      |         |         |                 |                                          |                                   |
| LWD016                                                                       | > 20                                   | > 20  | +            | +              | +    | +       | +       | +               | EIEC                                     | Nil                               |
| CHD048                                                                       | > 20                                   | 8-10  | +            | +              | +    | +       | +       | +               | <i>Salmonella</i> .<br>Durham            | Nil                               |
| CHD079                                                                       | 10-15                                  | > 20  | +            | +              | +    | +       | +       | +               | Nil                                      | Nil                               |
| CHD043                                                                       | 10-12                                  | 5-6   | +            | +              | +    | +       | +       | +               | <i>Shigella</i><br>serogroup<br>AB, CDEC | Nil                               |
| CHD056                                                                       | 6-8                                    | > 20  | +            | +              | +    | +       | +       | +               | <i>Yersinia</i><br><i>enterocolitica</i> | Nil                               |
| CHD054                                                                       | 2-3                                    | 1-2   | +            | +              | +    | +       | +       | +               | <i>Yersinia</i><br><i>ruckeri</i>        |                                   |
| CHD052                                                                       | 1-2                                    | 4-6   | -            | +              | +    | +       | +       | +               | Nil                                      | Nil                               |
| CHD051                                                                       | 2-3                                    | 2-3   | +            | +              | -    | +       | -       | +               | Nil                                      | Nil                               |
| LLD035                                                                       | 1-2                                    | 2-3   | -            | +              | +    | -       | +       | +               | <i>Salmonella</i><br>Elizabethville      | Nil                               |
| CHD067                                                                       | 4-5                                    | 12-15 | +            | -              | -    | -       | -       | -               | EIEC                                     | Nil                               |
| CHD086                                                                       | 1-2                                    | >20   | -            | -              | -    | -       | -       | -               | Nil                                      | EAEC                              |
| CHD087                                                                       | 2-3                                    | >20   | +            | -              | -    | -       | -       | -               | Nil                                      | Nil                               |
| LLD039                                                                       | 1-2                                    | 10-20 | -            | -              | -    | -       | -       | -               | Nil                                      | Nil                               |
| CHD101                                                                       | 2-3                                    | >20   | +            | -              | -    | -       | -       | -               | Nil                                      | Nil                               |
| LWD042                                                                       | 0-2                                    | 15-20 | -            | -              | -    | -       | -       | -               | <i>Salmonella</i><br>Riverside           | Nil                               |
| CHD102                                                                       | 0-2                                    | >20   | -            | +              | +    | +       | +       | +               | Nil                                      | EAEC                              |
| CHD103                                                                       | 2-3                                    | >20   | +            | -              | -    | -       | -       | -               | Nil                                      | Nil                               |
| CHD104                                                                       | 1-2                                    | 8-10  | -            | -              | -    | -       | -       | -               | Nil                                      | Nil                               |
| CHD105                                                                       | 3-4                                    | >20   | +            | +              | +    | +       | +       | +               | Nil                                      | Nil                               |
| CHD106                                                                       | 0-2                                    | >20   | -            | +              | +    | +       | +       | +               | Nil                                      | Nil                               |
| CHD107                                                                       | 2-3                                    | >20   | +            | -              | -    | -       | -       | -               | Nil                                      | Nil                               |
| CHD108                                                                       | 1-2                                    | 15-20 | -            | -              | -    | -       | -       | -               | Nil                                      | EAEC                              |
| CHD109                                                                       | 1-2                                    | 15-20 | -            | -              | -    | -       | -       | -               | Nil                                      | Nil                               |
| MND006<br>CHD010<br>CHD045<br>CHD061                                         | 0-2                                    | 8->20 | -            | -              | -    | -       | -       | -               | CDEC (1)                                 | ETEC<br>(ST)                      |
| CHD008<br>CHD011<br>CHD013<br>CHD014<br>CHD015<br>CHD049<br>CHD050<br>CHD057 | 0-2                                    | 0-8   | -            | -              | -    | -       | -       | -               | <i>Y. ruckeri</i> (1)                    | EAEC (8)                          |

|        |  |  |  |  |  |  |  |  |  |  |
|--------|--|--|--|--|--|--|--|--|--|--|
| CHD060 |  |  |  |  |  |  |  |  |  |  |
| CHD062 |  |  |  |  |  |  |  |  |  |  |
| CHD075 |  |  |  |  |  |  |  |  |  |  |
| CHD085 |  |  |  |  |  |  |  |  |  |  |
| LKD008 |  |  |  |  |  |  |  |  |  |  |
| LLH031 |  |  |  |  |  |  |  |  |  |  |
| LWD010 |  |  |  |  |  |  |  |  |  |  |
| LWD015 |  |  |  |  |  |  |  |  |  |  |
| LWD029 |  |  |  |  |  |  |  |  |  |  |
| LWD030 |  |  |  |  |  |  |  |  |  |  |
| LWD11  |  |  |  |  |  |  |  |  |  |  |

143 EPEC = enteropathogenic *E. coli*, EIEC = enteroinvasive *E. coli*, ETEC = enterotoxigenic *E. coli*, STEC =  
144 Shiga toxin-producing *E. coli*, EAEC = enteroaggregative *E. coli*, which is only sometimes invasive [20].  
145

Of the bacterial pathogens detected, *Shigella* and enteroinvasive *E. coli* (EIEC), *Salmonella* and *Yersinia*, spp. can produce dysenteric or invasive infections, while enterotoxigenic (ETEC) and enteropathogenic *E. coli* (EPEC) typically do not. The enteroaggregative *E. coli* (EAEC) pathotype is highly heterogenous and believed to comprise invasive and non-invasive strains however most isolates are believed to be non-invasive. In this study, thirteen of the 46 specimens yielded at least one bacterial pathogen, with five of the children from which these specimens were derived suffering mixed infections. Potentially invasive diarrheal pathogens were detected in nine of the 46 samples tested. Occult blood was detected by microscopy in six of the nine samples from which an invasive bacterial pathogen and six of the cases where no invasive bacterium was detected (p=0.01).

When we compared the performance of FOBT test kits to microscopy, we found that Cromatest, the innovator's product, had a sensitivity and specificity of 61.5 and 87.1% for occult blood detection respectively, compared to microscopy (Table 3). As shown in Table 3, two of the cheaper products that are readily available in Nigeria (Diaspot and Micropoint) performed as well as the innovator product, with Diaspot showing slightly higher specificity. Abon and LabACON were as specific as Cromatest, but slightly less sensitive.

**Table 3: Diagnostic efficacy of FOBT kits used (presuming that >2 RBCs per field indicates occult blood)**

| FOBT Kit   | Positives | Negatives | Sensitivity (%) | Specificity (%) | Positive predictive value (%) | Negative predictive value (%) |
|------------|-----------|-----------|-----------------|-----------------|-------------------------------|-------------------------------|
| Cromatest  | 12        | 32        | 61.54           | 87.10           | 66.67                         | 84.38                         |
| Abon       | 11        | 33        | 53.85           | 87.10           | 63.64                         | 81.82                         |
| Diaspot    | 11        | 33        | 61.54           | 90.32           | 72.73                         | 84.85                         |
| LabACON    | 11        | 33        | 53.85           | 87.10           | 63.64                         | 81.82                         |
| Micropoint | 12        | 32        | 61.54           | 87.10           | 66.67                         | 84.38                         |

## Discussion

Unless gross blood or mucus are seen in stools, delineating childhood diarrheas as potentially dysenteric gastrointestinal episodes, which require antimicrobials, is difficult on the basis of clinical signs and symptoms alone. A conventional approach to rapidly detect occult blood in stool by microscopy, which can be performed in under an hour but is tedious, requires trained personnel and uses resources also used for malaria testing in our setting. Culture can identify invasive bacterial pathogens at slightly higher throughput but takes 2- 3 days and additionally also requires skilled-labour. We sought to identify a quick, cheap and reliable approach that can be inexpensively implemented in health centres in Nigeria and similar settings irrespective of whether a medical laboratory scientist is available.

The innovator's FOBT kit is intermittently available in Nigeria and costlier than competitor products. We identified four generic FOBT test kits, which could be procured within Ibadan, Nigeria, a non-coastal city, without an international airport. In our evaluation, all five kits gave similar results and compared reasonably well with the gold standard, expert microscopy.

A large number of potentially invasive bacterial pathogens was detected by culture in the specimens and in six of these nine cases, a positive FOBT result was obtained with any kit. Even though we did not seek protozoal parasites that can elicit blood in stool, significantly higher number of specimens with positive FOBT outcomes had potentially invasive pathogens. Based on our findings, occult blood tests can play a role in identifying diarrheal cases requiring antibacterial therapy when more in-depth lab testing is unavailable. On the average, it takes 4 - 7 minutes to conduct test per specimen using any of the 5 FOBT kits. In 2017-18, each of these kits cost average of ₦ 30 (\$ 0.065) at current exchange rates (\$1 at ₦ 460.28). The cost and total time taken from sample processing to result demonstrate that FOBT test are fast, cheap, and easy to run.

Our evaluation has some limitations. Because we wished to comparatively evaluate several kits, only a small number of specimens could be screened. The number of specimens that could be evaluated was additionally constrained by Cromatest (the innovator's product) stock outs. Additionally, we did not seek

viral or protozoal pathogens, or *Campylobacter* species and many of these can produce invasive disease. However, even with these limitations, the data appear to suggest that fecal occult blood tests have significant value in delineating children with potentially invasive diarrhea, who should receive antibacterial therapy, and that generic products are functionally equivalent for this purpose to the innovator's product. Using these kits at the point-of-care in institutions where laboratory testing would normally be unavailable could help to improve patient care and contain antimicrobial resistance.

## **Conclusion**

FOBT kits are rapid, cost effective and valuable screening processes for quick diagnosis of diarrhea. They are viable alternatives to stool microscopy for paediatric specimens at the point-of-care. Inexpensive, locally available kits perform similarly to the more difficult-to-procure innovator's product. If used routinely, FOBTs could avoid unnecessary empiric antimicrobial prescription and could also be an early warning indicator for outbreaks due to invasive pathogens.

## **Acknowledgement**

We thank UNITECH laboratory Services for their assistance in market surveys for FOBT products in Nigeria, Abiodun Oyerinde and Emmanuel Bamidele for technical assistance and A Oladipo Aboderin for helpful discussions.

This work was supported by African Research Leader's Award MR/L00464X/1 to INO. The award is funded by the UK Medical Research Council (MRC) and the UK Department for International Development (DFID) under the MRC/DFID Concordat agreement and is also part of the EDCTP2 programme supported by the European Union. INO is a Calestous Juma Science Leadership Fellow (Award # INV-036234) supported by the Bill and Melinda Gates Foundation.

## References

1. World Gastroenterology Organisation, Practice Guideline for Acute Diarrhea, 2008.
2. McFarland LV, Elmer GW, McFarland M. Meta-analysis of probiotics for the prevention and treatment of acute pediatric diarrhea. *International journal of probiotics and prebiotics*. 2006;1(1):63.
3. DuPont HL. Acute infectious diarrhea in immunocompetent adults. *N Engl J Med*. 2014 Apr 17;370(16):1532-40. doi: 10.1056/NEJMra1301069. PMID: 24738670.
4. Vögtlin J, Stalder H, Hürzeler L, Vischer W, Loosli J, Gyr K, Stalder GA. Modified guaiac test may replace search for fecal leukocytes in acute infectious diarrhea. *Lancet*. 1983 Nov 19;2(8360):1204. doi: 10.1016/s0140-6736(83)91257-6. PMID: 6139563.
5. Institute for Health Metrics and Evaluation (IHME) Global burden of disease, 2018. Annual deaths from diarrheal diseases differentiated by age categories. Retrieved from <https://ourworldindata.org/diarrheal-diseases> on 29th January, 2020.
6. Antimicrobial Resistance Collaborators. Global burden of bacterial antimicrobial resistance in 2019: a systematic analysis. *Lancet*. 2022 Feb 12;399(10325):629-655. doi: 10.1016/S0140-6736(21)02724-0. Epub 2022 Jan 19. Erratum in: *Lancet*. 2022 Oct 1;400(10358):1102. PMID: 35065702; PMCID: PMC8841637.
7. Angell B, Sanuade O, Adetifa IMO, Okeke IN, Adamu AL, Aliyu MH, Ameh EA, Kyari F, Gadanya MA, Mabayoje DA, Yinka-Ogunleye A, Oni T, Jalo RI, Tsiga-Ahmed FI, DalGLISH SL, Abimbola S, Colbourn T, Onwujekwe O, Owoaje ET, Aliyu G, Aliyu SH, Archibong B, Ezech A, Ihekweazu C, Iliyasu Z, Obaro S, Obadare EB, Okonofua F, Pate M, Salako BL, Zanna FH, Glenn S, Walker A, Ezalarab M, Naghavi M, Abubakar I. Population health outcomes in Nigeria compared with other west African countries, 1998-2019: a systematic analysis for the Global Burden of Disease Study. *Lancet*. 2022 Mar 19;399(10330):1117-1129. doi: 10.1016/S0140-6736(21)02722-7. Epub 2022 Mar 15. PMID: 35303469; PMCID: PMC8943279.
8. Sharma VK, Vasudeva R, Howden CW. Colorectal cancer screening and surveillance practices by primary care physicians: Results of a national survey. *Am J Gastroenterol* 2000;95:1551–6.
9. Sharma VK, Corder FA, Raufman JP, et al. Survey of internal medicine residents' use of the fecal occult blood test and their understanding of colorectal cancer screening and surveillance. *AmJ Gastroenterol* 2000;95: 2068–73.
10. Hossain MA, Albert MJ. Effect of duration of diarrhea and predictive values of stool leucocytes and red blood cells in the isolation of different serogroups or serotypes of *Shigella*. *Trans R Soc Trop Med Hyg* 1991;85:664–6.
11. Ronsmans C, Bennish ML, Wierzba T. Diagnosis and management of dysentery by community health workers. *Lancet* 1988;2: 552–5.
12. Friedman A, Chan A, Chin LC, Deen A, Hammerschlag G, Lee M, Liddell J, Loh K, Moore E, Ng J, Gibson PR. Use and abuse of fecal occult blood tests in an acute hospital inpatient setting. *Internal Medicine Journal* 40 (2010) 107–111. 107.
13. Bardhan PK, Beltinger J, Beltinger RW, Hossain A, Mahalanabis D, Gyr K. Screening of patients with acute infectious diarrhea: Evaluation of clinical features, fecal microscopy, and fecal occult bloodtesting. *Scand J Gastroenterol* 2000;35:54–60.
14. Murray, PR, Baron, EJ, Pfaller, MA, Tenover, FC, Tenover, RH. *Manual of Clinical Microbiology*, 6th edition. *American Society of Microbiology Press*, 1995. Washington DC. 1482 p.
15. Arora BB, Maheshwari M, Devgan N, Arora DR. Prevalence of Trichomoniasis, Vaginal Candidiasis, Genital Herpes, Chlamydia, and Actinomycosis among Urban and Rural Women of Haryana, India. *J Sex Transm Dis*. 2014;2014:963812. doi: 10.1155/2014/963812. Epub 2014 Oct 28. PMID: 26316979; PMCID: PMC4437425.

16. Odetoyin BW, Hofmann J, Aboderin AO, Okeke IN. Diarrheagenic *Escherichia coli* in mother-child Pairs in Ile-Ife, South Western Nigeria. *BMC Infect Dis* **16**, 28 (2015).  
<https://doi.org/10.1186/s12879-016-1365-x>
17. Akinlabi OC, Dada RA, Nwoko EQ, Okeke IN. Insufficiency of PCR diagnostics for Detection of Diarrheagenic *Escherichia coli* in Ibadan, Nigeria. medRxiv 2023.01.06.23284276; doi:<https://doi.org/10.1101/2023.01.06.23284276>
18. Aranda KR, Fagundes-Neto U, Scaletsky IC. Evaluation of multiplex PCRs for diagnosis of infection with diarrheagenic *Escherichia coli* and *Shigella* spp. *J Clin Microbiol*. 2004 Dec;42(12):5849-53. doi: 10.1128/JCM.42.12.5849-5853.2004. PMID: 15583323; PMCID: PMC535216.
19. Tennant SM, Diallo S, Levy H, Livio S, Sow SO, Tapia M, et al. Identification by PCR of Non-typhoidal *Salmonella enterica* Serovars Associated with Invasive Infections among Febrile Patients in Mali. *PLoS Neglected Tropical Diseases*. 2010;4(3):e621.
20. Bouckennooghe AR, DuPont HL, Jiang ZD, Adachi J, Mathewson JJ, Verenkar MP, Rodrigues S, Steffen R. Markers of enteric inflammation in enteroaggregative *Escherichia coli* diarrhea in travelers. *The American journal of tropical medicine and hygiene*. 2000 Jun 1;62(6):711-3.

## Figure legend

Figure 1: Positive test results for the five FOBT kits tested

(a) CROMATEST, (b) Abon, (c) Diaspot, (d) LabACON and (e) Micropoint



# Figure1

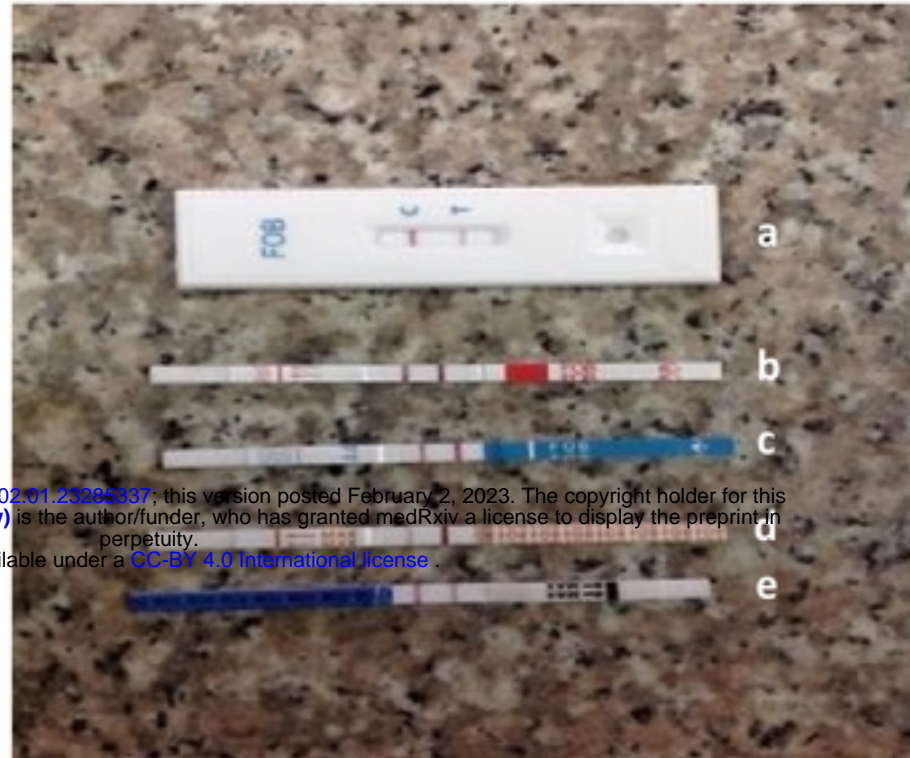

medRxiv preprint doi: <https://doi.org/10.1101/2023.02.01.23285337>; this version posted February 2, 2023. The copyright holder for this preprint (which was not certified by peer review) is the author/funder, who has granted medRxiv a license to display the preprint in perpetuity. It is made available under a [CC-BY 4.0 International license](https://creativecommons.org/licenses/by/4.0/).
